# Supplementary material for: Characterization of IncC Plasmids in Enterobacterales of Food-Producing Animals Originating From China
Source: Front Microbiol. 2020 Oct 27;11:580960. doi: 10.3389/fmicb.2020.580960 (PMC7652850; doi:10.3389/fmicb.2020.580960)
Supplement: Supplementary file 4 [file Table_4.XLSX]

## Sheet: Sheet1
Table S4. Functional genes of IncC plasmid
Plasmid	Replication		Mobilization																		Maintenance						Regulation				Metabolism														Other
	repA	ter	mobI	traI	traD	traL	traE	traK	traB	traV	traA	traC	trhF	traW	traU	traN	traF	traH	traG	slt	ant	tox	parA	parB	053gene	stbA	acr1	acrD	acrC	acr2	dcm1	dcm2	topB	ssb	bet	exo	dcm3	orf102	nuc	pri	int	yacC	kfrA	uvrD	sppA	dsbA	dsbC
pEC1-1/2a	﹢	﹢	﹢	﹢	﹢	﹢	﹢	﹢	﹢	﹢	﹢	﹢	﹢	﹢	﹢	﹢	﹢	﹢	﹢	﹢	﹢	﹢	﹢	﹢	﹢	﹢	﹢	﹢	﹢	﹢	﹣	﹢	﹢	﹢	﹢	﹢	﹢	﹢	﹢	﹣	﹢	﹢	﹢	﹢	﹢	﹢	﹢
pEC2-1/2a	﹢	﹢	﹢	﹢	﹢	﹢	﹢	﹢	﹢	﹢	﹢	﹢	﹢	﹢	﹢	﹢	﹢	﹢	﹢	﹢	﹢	﹢	﹢	﹢	﹢	﹢	﹢	﹢	﹢	﹢	﹣	﹢	﹢	﹢	﹢	﹢	﹢	﹢	﹢	﹢	﹢	﹢	﹢	﹢	﹢	﹢	﹢
pEC3-1/2a	﹢	﹢	﹢	﹢	﹢	﹢	﹢	﹢	﹢	﹢	﹢	﹢	﹢	﹢	﹢	﹢	﹢	﹢	﹢	﹢	﹢	﹢	﹢	﹢	﹢	﹢	﹢	﹢	﹢	﹢	﹣	﹢	﹢	﹢	﹢	﹢	﹢	﹢	﹢	﹢	﹢	﹢	﹢	﹢	﹢	﹢	﹢
pEC5-1/2a	﹢	﹢	﹢	﹢	﹢	﹣	﹣	﹣	﹣	﹣	﹣	﹢	﹢	﹢	﹢	﹢	﹢	﹢	﹢	﹢	﹢	﹢	﹢	﹢	﹢	﹢	﹢	﹢	﹢	﹢	﹣	﹢	﹢	﹢	﹢	﹢	﹢	﹢	﹢	﹢	﹢	﹢	﹢	﹢	﹢	﹢	﹢
pEC6-1/2a	﹢	﹢	﹢	﹢	﹢	﹢	﹢	﹢	﹢	﹢	﹢	﹢	﹢	﹢	﹢	﹢	﹢	﹢	﹢	﹢	﹢	﹢	﹢	﹢	﹢	﹢	﹢	﹢	﹢	﹢	﹣	﹢	﹢	﹢	﹢	﹢	﹢	﹢	﹢	﹢	﹢	﹢	﹢	﹢	﹣*	﹢	﹢
pEC7-1/2a	﹢	﹢	﹢	﹢	﹢	﹢	﹢	﹢	﹢	﹢	﹢	﹣	﹣	﹣	﹣	﹣	﹢	﹢	﹢	﹢	﹢	﹢	﹢	﹢	﹢	﹢	﹢	﹢	﹢	﹢	﹣	﹢	﹢	﹣	﹣	﹣	﹣	﹣	﹣	﹣	﹢	﹢	﹢	﹢	﹢	﹢	﹣
pEC8-1/2a	﹢	﹢	﹢	﹢	﹢	﹢	﹢	﹢	﹢	﹢	﹢	﹢	﹢	﹢	﹢	﹢	﹢	﹢	﹢	﹢	﹢	﹢	﹢	﹢	﹢	﹢	﹢	﹢	﹢	﹢	﹣	﹢	﹢	﹢	﹢	﹢	﹢	﹢	﹢	﹢	﹢	﹢	﹢	﹢	﹢	﹢	﹢
pEC10-1/2a	﹢	﹢	﹢	﹢	﹢	﹢	﹢	﹢	﹢	﹢	﹢	﹣	﹣	﹣	﹣	﹣	﹢	﹢	﹢	﹢	﹢	﹢	﹢	﹢	﹢	﹢	﹢	﹢	﹢	﹢	﹣	﹢	﹢	﹣	﹣	﹣	﹣	﹣	﹣	﹣	﹢	﹢	﹢	﹢	﹢	﹢	﹢
pEC13-1/2a	﹢	﹢	﹢	﹢	﹢	﹢	﹢	﹢	﹢	﹢	﹢	﹣	﹣	﹣	﹣	﹣	﹢	﹢	﹢	﹢	﹢	﹢	﹢	﹢	﹢	﹢	﹢	﹢	﹢	﹢	﹣	﹢	﹢	﹣	﹣	﹣	﹣	﹣	﹣	﹣	﹢	﹢	﹢	﹢	﹢	﹢	﹢
pKC1-1/2a	﹢	﹢	﹢	﹢	﹢	﹢	﹢	﹢	﹢	﹢	﹢	﹣*	﹣	﹣	﹣	﹣	﹢	﹢	﹢	﹢	﹢	﹢	﹢	﹢	﹢	﹢	﹢	﹢	﹢	﹢	﹣	﹢	﹢	﹣	﹣	﹣	﹣	﹣	﹣	﹣	﹢	﹢	﹢	﹢	﹢	﹢	﹢
pKC2-1/2a	﹢	﹢	﹢	﹢	﹢	﹢	﹢	﹢	﹢	﹢	﹢	﹣*	﹣	﹣	﹣	﹣	﹢	﹢	﹢	﹢	﹢	﹢	﹢	﹢	﹢	﹢	﹢	﹢	﹢	﹢	﹣	﹢	﹢	﹣	﹣	﹣	﹣	﹣	﹣	﹣	﹢	﹢	﹢	﹢	﹢	﹢	﹢
pSC1-1/2a	﹢	﹢	﹢	﹢	﹢	﹢	﹢	﹢	﹢	﹢	﹢	﹢	﹢	﹢	﹢	﹣*	﹢	﹢	﹢	﹢	﹢	﹢	﹢	﹢	﹢	﹢	﹢	﹢	﹢	﹢	﹣	﹢	﹢	﹣	﹣	﹣	﹣	﹣	﹣	﹣	﹢	﹢	﹢	﹢	﹢	﹢	﹢
pPC1-1/2a	﹢	﹢	﹢	﹢	﹢	﹢	﹢	﹢	﹢	﹢	﹢	﹢	﹢	﹢	﹢	﹢	﹢	﹢	﹢	﹢	﹢	﹢	﹢	﹢	﹢	﹢	﹢	﹢	﹢	﹢	﹣	﹢	﹢	﹢	﹢	﹢	﹢	﹢	﹢	﹢	﹢	﹢	﹢	﹢	﹢	﹢	﹢
pKC3-1/2b	﹢	﹢	﹢	﹢	﹢	﹢	﹢	﹢	﹢	﹢	﹢	﹢	﹢	﹢	﹢	﹢	﹢	﹢	﹢	﹢	﹢	﹢	﹢	﹢	﹢	﹢	﹢	﹢	﹢	﹢	﹣	﹢	﹢	﹢	﹢	﹢	﹢	﹢	﹢	﹢	﹢	﹢	﹢	﹢	﹢	﹢	﹢
pCC1-1/2b	﹢	﹢	﹢	﹢	﹢	﹢	﹢	﹢	﹢	﹢	﹣*	﹣	﹣	﹣	﹣	﹣*	﹢	﹢	﹢	﹢	﹢	﹢	﹢	﹢	﹢	﹢	﹢	﹢	﹢	﹢	﹣	﹢	﹢	﹢	﹢	﹢	﹢	﹢	﹢	﹢	﹢	﹢	﹢	﹢	﹢	﹢	﹣
pEC4-1b	﹢	﹢	﹢	﹣	﹣	﹣	﹣*	﹢	﹢	﹢	﹢	﹢	﹢	﹣*	﹣	﹣	﹢	﹢	﹣*	﹣*	﹢	﹢	﹢	﹢	﹢	﹢	﹢	﹢	﹢	﹢	﹣	﹣	﹣	﹣	﹣	﹣	﹣	﹣	﹣	﹣	﹢	﹢	﹢	﹢	﹢	﹢	﹢
pEC11-1b	﹢	﹢	﹢	﹢	﹢	﹢	﹢	﹢	﹢	﹢	﹢	﹢	﹢	﹢	﹢	﹣*	﹢	﹢	﹢	﹢	﹢	﹢	﹢	﹢	﹢	﹢	﹢	﹢	﹢	﹢	﹣	﹢	﹢	﹢	﹢	﹢	﹢	﹢	﹢	﹢	﹢	﹢	﹢	﹢	﹢	﹢	﹢
pEC12-1b	﹢	﹢	﹢	﹣	﹣	﹣	﹣	﹣	﹣	﹣	﹣	﹣	﹣	﹣	﹣	﹣	﹢	﹢	﹢	﹢	﹢	﹢	﹢	﹢	﹢	﹢	﹢	﹢	﹢	﹢	﹣	﹣	﹣	﹣	﹣	﹣	﹣	﹣	﹣	﹣	﹢	﹢	﹢	﹢	﹢	﹢	﹣
pEC14-1b	﹢	﹢	﹢	﹢	﹢	﹢	﹢	﹢	﹢	﹢	﹢	﹢	﹢	﹢	﹢	﹢	﹢	﹢	﹢	﹢	﹢	﹢	﹢	﹢	﹢	﹢	﹢	﹢	﹢	﹢	﹣	﹢	﹢	﹢	﹢	﹢	﹢	﹢	﹢	﹢	﹢	﹢	﹢	﹢	﹢	﹢	﹢
pEC9-2	﹢	﹢	﹢	﹢	﹢	﹢	﹢	﹢	﹢	﹢	﹢	﹣*	﹣	﹣	﹣	﹣	﹢	﹢	﹢	﹢	﹢	﹢	﹢	﹢	﹢	﹢	﹢	﹢	﹢	﹢	﹣	﹢	﹢	﹣	﹣	﹣	﹣	﹣*	﹢	﹢	﹢	﹢	﹢	﹢	﹢	﹢	﹢
* broken genes.
